# Supplementary material
Source: publisher site journal article supplement (https://www.dovepress.com/article/384675)
Supplement: Supplementary file 1 [file get_supplementary_file.php]

ORIGINAL RESEARCH

Jun Wan et al

# Anti-oxidative, anti-apoptotic, and M2 polarized liposome nanoparticles for selective treatment of atherosclerosis

Jun Wan1*

Jie Yang1*
Wenrui Lei1

Zezhou Xiao1

Pengyu Zhou1

Shaoyi Zheng1

Peng zhu1

1 Department of Cardiovascular Surgery, Nanfang Hospital, Southern Medical University, 1838 Guangzhou Avenue North, 510515 Guangzhou, Guangdong, China.

*These authors contributed equally to this work

Correspondence: Shaoyi Zheng, Peng zhu

Department of Cardiovascular Surgery, Nanfang Hospital, Southern Medical University, 1838 Guangzhou Avenue North, 510515 Guangzhou, Guangdong, China.

Tel : +86-020-62786747

Email : Shaoyi Zheng zhsy@smu.edu.cn; Peng Zhu doctff@smu.edu.cn

## Supporting Information

**Table S1** Characterization of. Data are presented as the mean ± SD (n=3).

| NPs | Size (nm) | PDI | Zeta potential (mV) | EE | LC |
| --- | --- | --- | --- | --- | --- |
| LNP | 185.47 ± 0.61 | 0.10 ± 0.02 | -18.93 ± 0.34 | - | - |
| SE-LNP | 208.90 ± 3.99 | 0.19 ± 0.01 | -20.63 ± 0.29 | 93.57 ± 1.28 | 43.39 ± 7.60 |

PDI, polydispersity index; EE = (total drug − unloaded drug) / total drug×100%; LC = the mass of drug in the LNPs / the total mass of the LNPs×100%


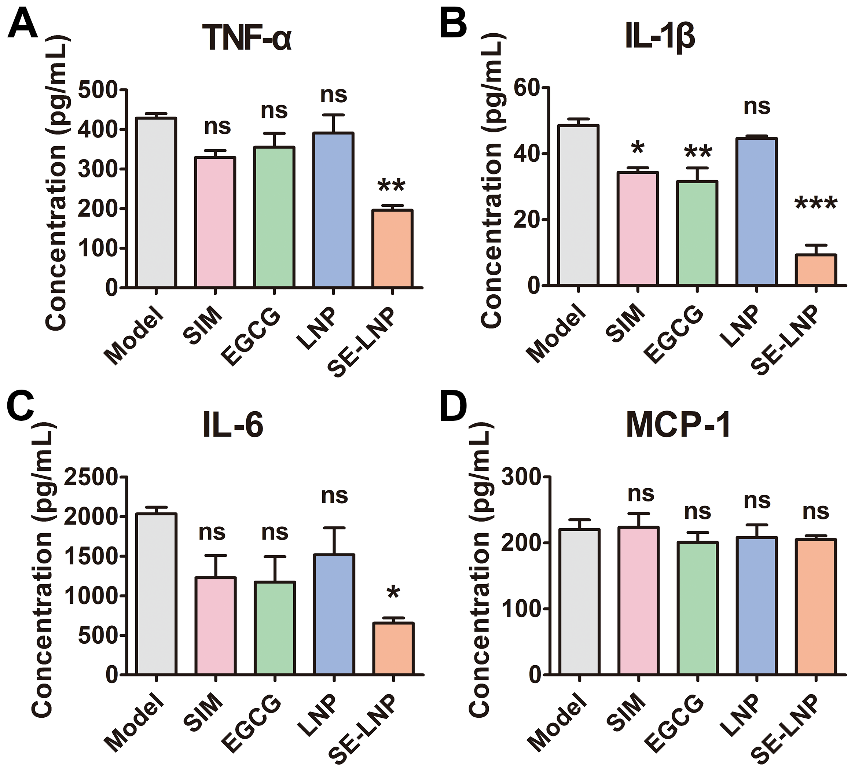


**Figure S1 Inflammatory factor level of cells treated by each group under the action of inflammation.** ***p < 0.01, **p < 0.05, ***p < 0.01. ns, no statistical significance.**
